# Supplementary material for: The positional isomerism in bimetal nanoclusters
Source: Royal Society of Chemistry journal article supplement (doi:10.1039/d0ce01334j), 2020-01-01
Supplement: d0ce01334j1.pdf [file d0ce01334j1.pdf]

## Supporting Information

### The positional isomerism in the bimetal nanocluster

Lizhong He\*, Xinhai He, Junbo Wang, Yinhu Qu, Xiaolei Su, Jiaojiao Zheng, Xiaoliang Zhao

*School of Materials Science and Engineering, Xi'an Polytechnic University, Xi'an,  
710048, PR China*

## 1. Experimental Details

### 1.1 Chemicals.

Silver nitrate ( $\text{AgNO}_3$ , 99.99%), Sodium borohydride ( $\text{NaBH}_4$ , 98.0%), Triphenylphosphine and 2-Ethylbenzenethiol (95%) were purchased from Aladdin. Tetrachloroauric(III) acid ( $\text{HAuCl}_4 \cdot 4\text{H}_2\text{O}$ , 99.7%) was obtained from Shanghai chemical reagent co., ltd. Methanol (99.5%) and dichloromethane (AR) were purchased from Sinopharm chemical reagent co., ltd. All other chemicals were of analytical grade, and deionized water was used throughout the experiments, produced with a Milli-Q NANO pure water system (resistivity 18.2  $\text{M}\Omega \text{ cm}$ ).

### 1.2 Synthesis of $\text{Au}_{12}\text{Ag}_{32}$ -1 nanocluster.

The synthesis of atomically precise  $\text{Au}_{12}\text{Ag}_{32}$ -1 nanocluster is called one-pot synthesis. In brief, to obtain the target nanocluster with precise structure, 80 mg Silver nitrate ( $\text{AgNO}_3$ ) and 20 mg Tetrachloroauric (III) acid ( $\text{HAuCl}_4 \cdot 4\text{H}_2\text{O}$ ) were completely dissolved in 5 mL of methanol and 5 mL dichloromethane under vigorous stirring, after 15 minutes, the mixed solution was cooled to 0 °C in an ice bath. Then, 200 mg Triphenylphosphine ( $\text{PPh}_3$ ) and 70  $\mu\text{L}$  2-Ethylbenzenethiol were added quickly for 20 minutes. Subsequently, 110 mg of solid  $\text{NaBH}_4$  which dissolved in 2 mL ice-cold pure water were added drop by drop using pipettor. The reaction was aged for 11 h in an ice-bath under stirring and the color of the total solution changed from light grey to dark immediately. The aqueous phase was discarded and the crude product was washed with  $\text{CH}_3\text{OH}$  four times to remove inorganic salt and excess thiolate utterly.

**1.3 Synthesis of  $\text{Au}_{12}\text{Ag}_{32}$ -2 nanocluster.** (The nanoclusters were synthesized following literature report S1).

### 1.4 Single-crystal growth and analysis.

Black crystals were formed from a  $\text{CH}_2\text{Cl}_2$ /hexane solution of the nanoclusters at 4 °C after about three months. The diffraction data for  $\text{Au}_{12}\text{Ag}_{32}$  nanoclusters were collected at 173 K on a Bruker APEX DUO X-ray diffractometer using Cu K $\alpha$  radiation ( $1/\lambda 1.54184 \text{ \AA}$ ).

### 1.5 Characterization

Ultraviolet-visible-near-infrared absorption measurements were performed on a Shimadzu UV-

3600 spectrophotometer (DCM as solvent). The single-crystal X-ray diffraction data were collected on a Bruker D8 VENTURE AXS photon 100 diffractometer with helios mx multilayer monochromator Mo K $\alpha$  radiation ( $\lambda = 0.71083 \text{ \AA}$ ). Thermogravimetric analysis (TGA) ( $\sim 6 \text{ mg}$  sample used) was conducted in a N<sub>2</sub> atmosphere (flow rate  $\sim 50 \text{ mL/min}$ ) using a TG/DTA 6300 analyzer (Seiko Instruments, Inc.), and the heating rate was  $10 \text{ }^{\circ}\text{C/min}$ . X-ray photoelectron spectroscopy (XPS) measurements were performed on an ESCALAB 250Xi XPS spectrometer (Thermo Scientific, America), using a monochromatized Al K $\alpha$  source and equipped with an Ar<sup>+</sup> ion sputtering gun.

## 2. Supporting Figures

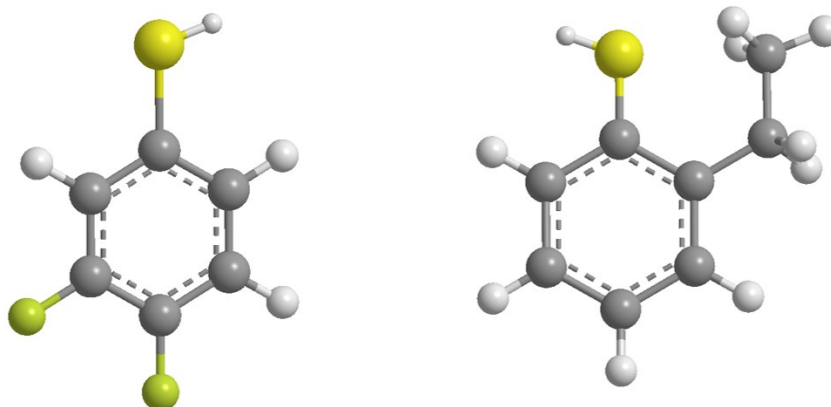

**Figure S1.** The total structures of 3, 4-difluorothiophenol (left) and 2-ethylbenzenethiol (right). Color labels: light green = F, yellow = S, white = H, gray = C.

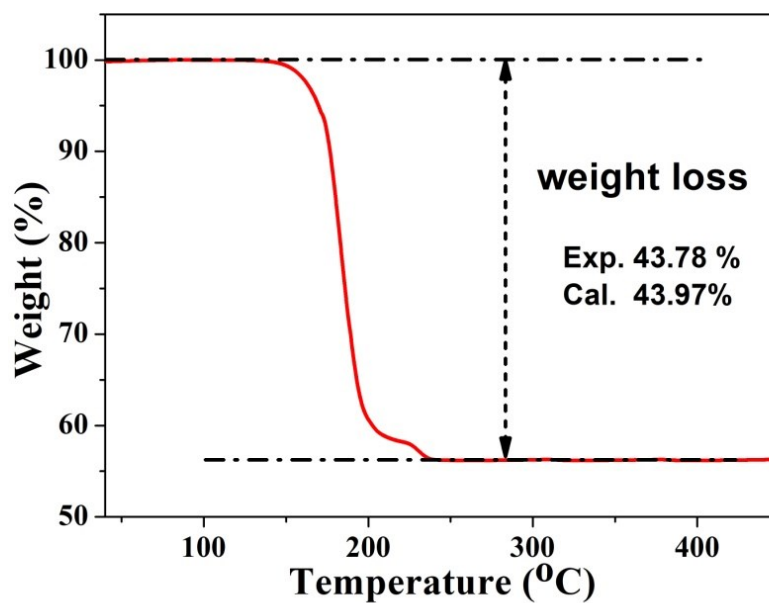

**Figure S2.** TGA of  $\text{Au}_{12}\text{Ag}_{32}(\text{2-EBT})_{26}(\text{PPh}_3)_4$  nanocluster.

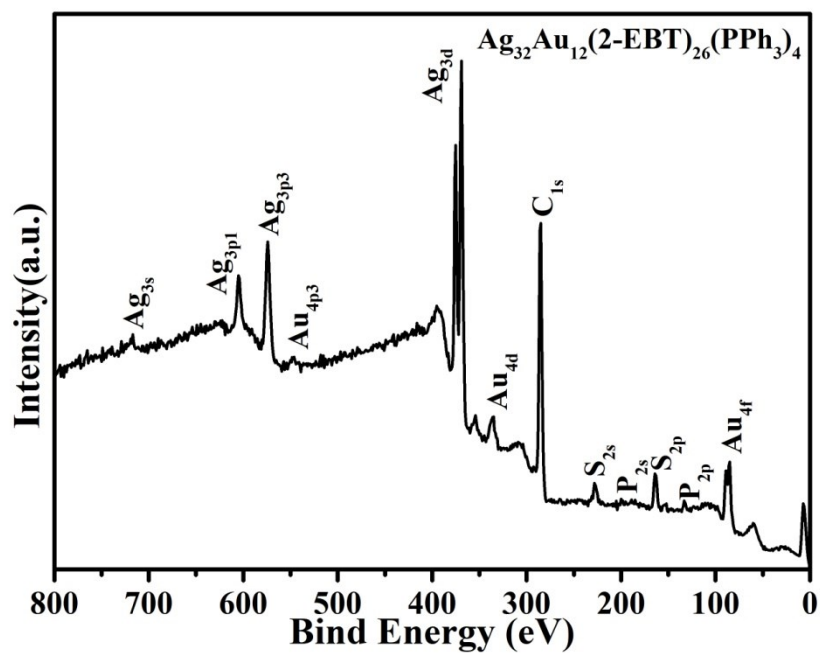

**Figure S3.** XPS spectrum of  $\text{Au}_{12}\text{Ag}_{32}(\text{2-EBT})_{26}(\text{PPh}_3)_4$  nanocluster.

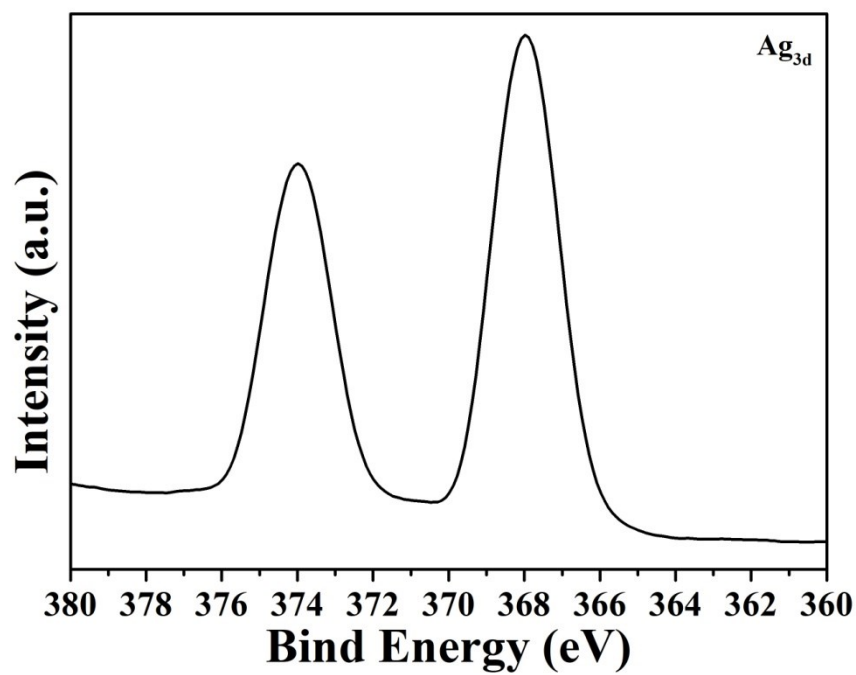

**Figure S4.** XPS spectrum of  $\text{Ag}_{3d}$  in the  $\text{Au}_{12}\text{Ag}_{32}(\text{2-EBT})_{26}(\text{PPh}_3)_4$  nanocluster.

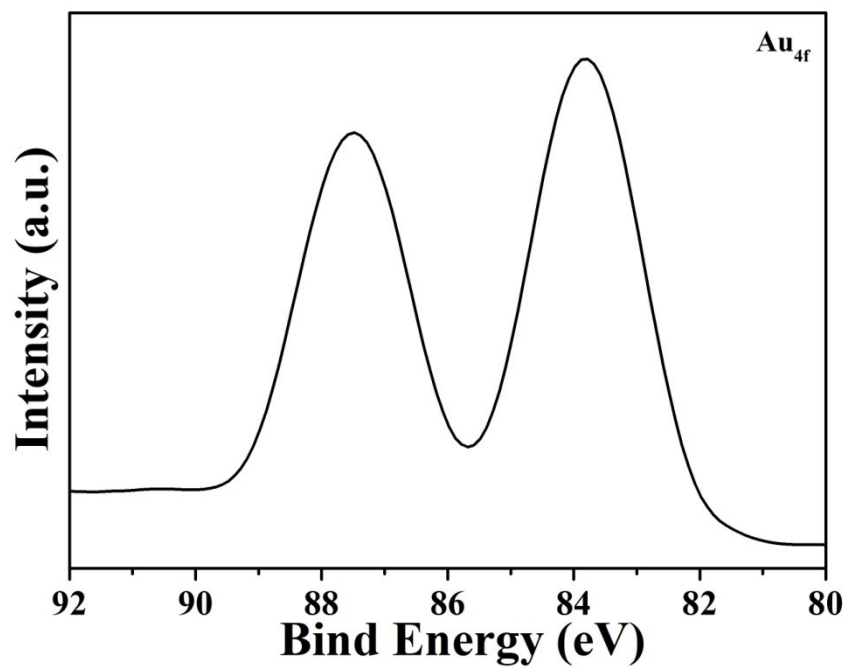

**Figure S5.** XPS spectrum of Au4f in the  $\text{Au}_{12}\text{Ag}_{32}(\text{2-EBT})_{26}(\text{PPh}_3)_4$  nanocluster.

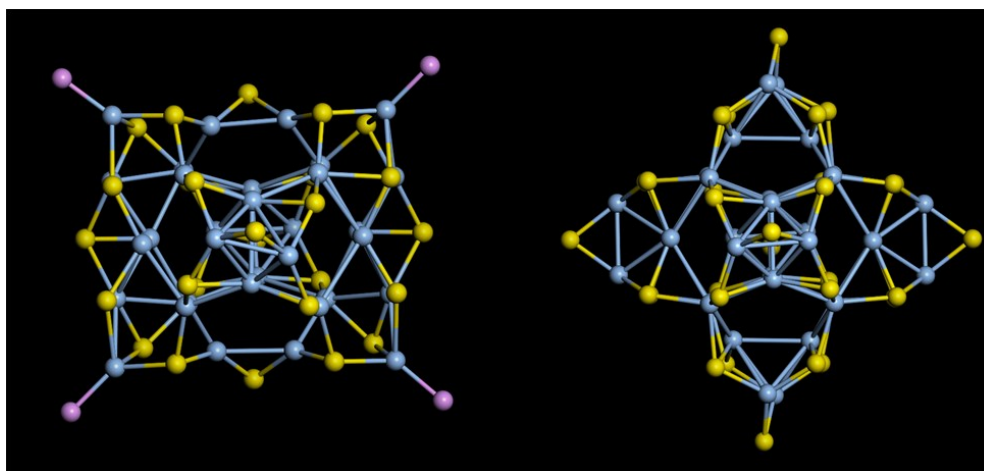

**Figure S6.** The totally surface staple structure of  $\text{Au}_{12}\text{Ag}_{32}(\text{2-EBT})_{26}(\text{PPh}_3)_4$  nanocluster (left) and  $\text{Ag}_{32}\text{Ag}_{12}(\text{3,4-DFT})_{30}$  nanocluster (right). Color labels: Ag, light blue; S, yellow; P, pink.

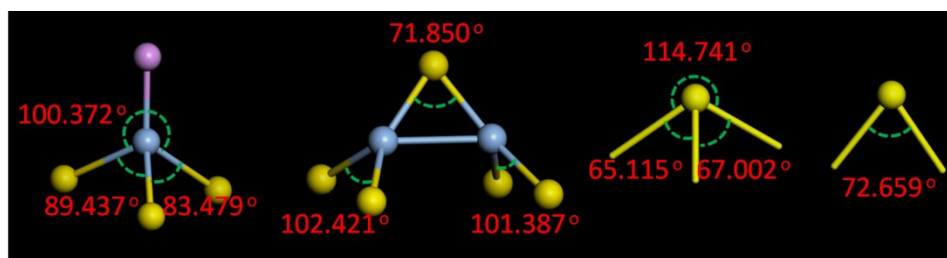

**Figure S7.** The detailed structure of four types of surface staples in the  $\text{Au}_{12}\text{Ag}_{32}(\text{2-EBT})_{26}(\text{PPh}_3)_4$  nanocluster. Color labels: Ag, light blue; S, yellow; P, pink.

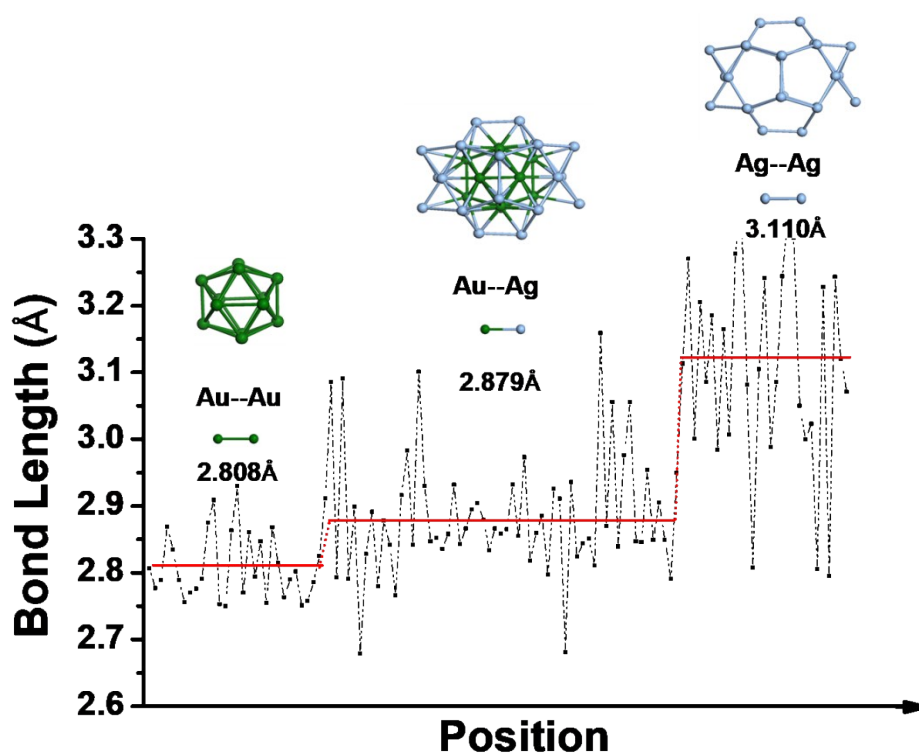

**Figure S8.** Bond lengths of  $\text{Au}_{12}\text{Ag}_{32}(\text{2-EBT})_{26}(\text{PPh}_3)_4$  nanocluster. Color labels: Au, green; Ag, light blue.

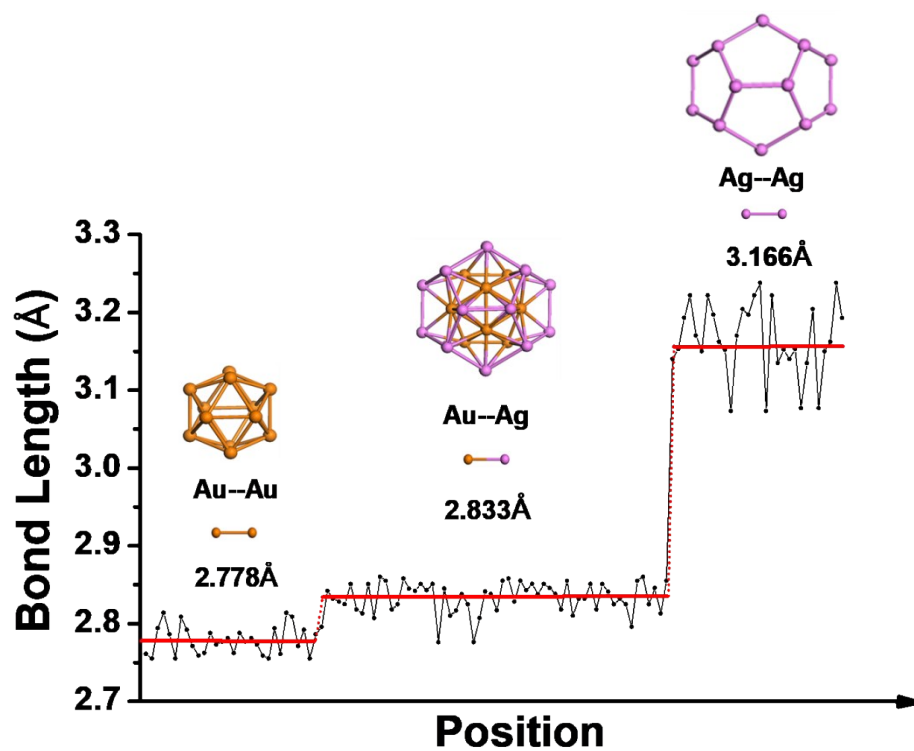

**Figure S9.** Bond lengths of  $\text{Au}_{12}\text{Ag}_{32}(3,4\text{-DFT})_{30}$  nanocluster. Color labels: Au, brown; Ag, pink.

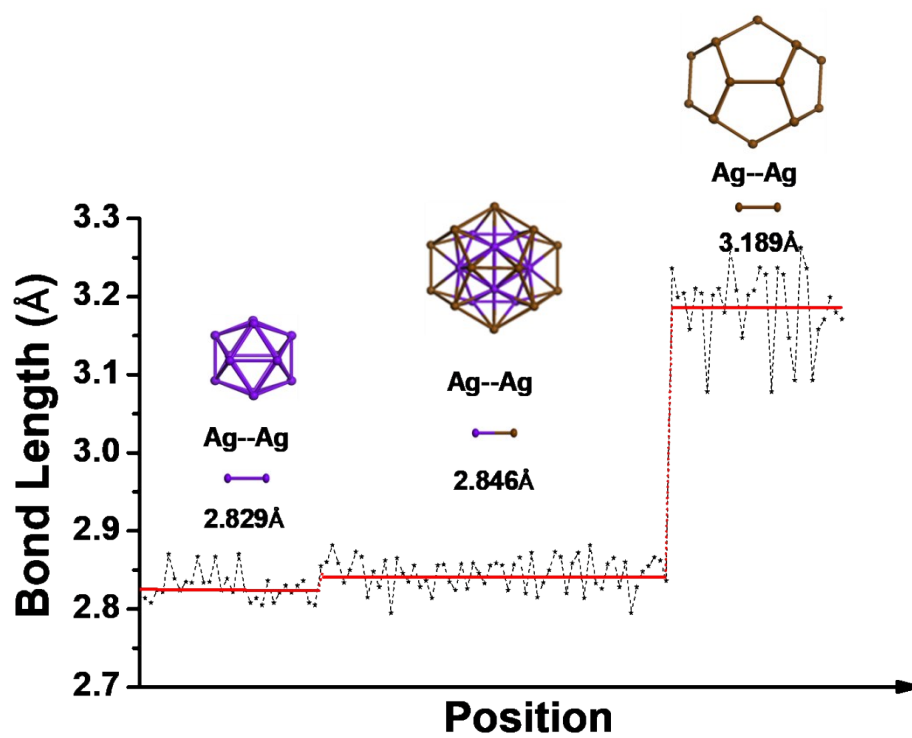

**Figure S10.** Bond lengths of  $\text{Ag}_{44}(\text{3,4-DFT})_{30}$  nanocluster. Color labels: Ag, brown and purple.



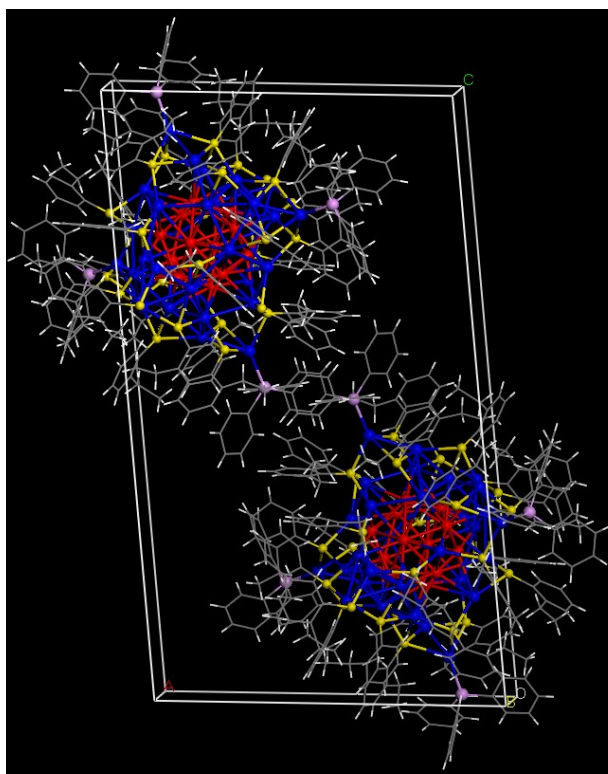

**Figure S11.** Unit cell of  $\text{Ag}_{32}\text{Ag}_{12}(\text{2-EBT})_{26}(\text{PPh}_3)_4$  nanocluster. Color labels: Au, red; Ag, blue; S, yellow; P, pink; C, gray; H, white.

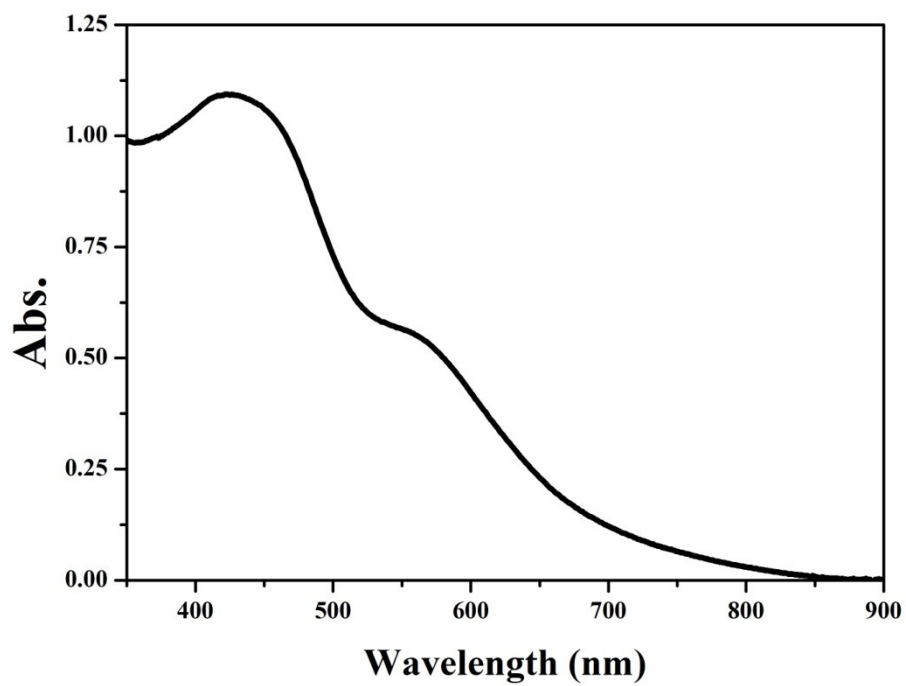

**Figure S12.** UV/Vis spectrum of  $\text{Au}_{12}\text{Ag}_{32}(\text{2-EBT})_{26}(\text{PPh}_3)_4$  nanocluster.

### 3 Single crystal data

#### 3.1 Single crystal data for Ag<sub>32</sub>Au<sub>12</sub> nanocluster

Table 1. Crystal data and structure refinement for Ag<sub>32</sub>Au<sub>12</sub>.

|                                    |                                                                                                           |
|------------------------------------|-----------------------------------------------------------------------------------------------------------|
| Empirical formula                  | C <sub>280</sub> H <sub>294</sub> Ag <sub>32</sub> Au <sub>12</sub> P <sub>4</sub> S <sub>26</sub>        |
| Formula weight                     | 10432.01                                                                                                  |
| Temperature/ K                     | 173                                                                                                       |
| Wavelength                         | 0.71073 Å                                                                                                 |
| Crystal system                     | triclinic                                                                                                 |
| Space group                        | P-1                                                                                                       |
| Unit cell dimensions               | a=21.071(3) Å      α= 80.137(4)°<br>b=21.271(3) Å      β= 82.278(4)°<br>c=36.786(5) Å      γ = 78.032(4)° |
| Volume/ Å <sup>3</sup>             | 15807(4) Å <sup>3</sup>                                                                                   |
| Z                                  | 2                                                                                                         |
| ρ <sub>calc</sub> /cm <sup>3</sup> | 2.192                                                                                                     |
| μ/mm <sup>-1</sup>                 | 7.708                                                                                                     |
| F(000)                             | 9804.0                                                                                                    |
| Index ranges                       | -27<=h<=21, -27<=k<=27, -48<=l<=43                                                                        |
| Reflections collected              | 140783                                                                                                    |
| Independent reflections            | 73291 [R(int) = 0.0861]                                                                                   |
| Theta range for data collection    | 1.976 to 27.762°                                                                                          |
| Completeness to theta = 25.242°    | 99.1 %                                                                                                    |
| Refinement method                  | Full-matrix least-squares on F <sup>2</sup>                                                               |
| Data / restraints / parameters     | 73291 / 1733 / 3163                                                                                       |
| Goodness-of-fit on F <sup>2</sup>  | 1.033                                                                                                     |
| Final R indices [I>2σ(I)]          | R <sub>1</sub> = 0.0963, wR <sub>2</sub> = 0.2516                                                         |
| R indices (all data)               | R <sub>1</sub> = 0.1697, wR <sub>2</sub> = 0.3022                                                         |
| Extinction coefficient             | n/a                                                                                                       |

|                                                |                  |
|------------------------------------------------|------------------|
| Largest diff. peak and hole/ e Å <sup>-3</sup> | 4.748 and -7.871 |
|------------------------------------------------|------------------|

#### 4. References:

(S1) Yang, H.; Wang, Y.; Huang, H.; Gell, L.; Lehtovaara, L.; Malola, S.; Hakkinen, H.; Zheng, N. All-thiol-stabilized Ag<sub>44</sub> and Au<sub>12</sub>Ag<sub>32</sub> nanoparticles with single-crystal structures. *Nat. Commun.* **2013**, *4*, 2422.
